# Supplementary material
Source: HighWire-hosted journal article supplement (http://www.cmaj.ca/highwire/filestream/57634/field_highwire_adjunct_files/1/acute-mcivor-2-at.pdf)
Supplement: acute-mcivor-2-at.pdf [file acute-mcivor-2-at.pdf]

**Appendix 2** (as supplied by the authors): Modified procedure for rapid-sequence intubation, as presented in the emergency department asthma care pathway ([www.on.lung.ca/Health-Care-Professionals/EDACP/emerg\\_path\\_dl.php](http://www.on.lung.ca/Health-Care-Professionals/EDACP/emerg_path_dl.php)). Reproduced with permission from the Ontario Lung Association. Funded by the Government of Ontario.

## Rapid Sequence Intubation

For rapid sequence intubation, when available, consult a physician experienced in this procedure

|                                                                                                                                                                                                                                                                                               |                                                                                                                                                                                                                                                                                                     |
|-----------------------------------------------------------------------------------------------------------------------------------------------------------------------------------------------------------------------------------------------------------------------------------------------|-----------------------------------------------------------------------------------------------------------------------------------------------------------------------------------------------------------------------------------------------------------------------------------------------------|
| <b>Prepare:</b> <ul style="list-style-type: none"><li>• Assemble equipment and verify functioning: suction, self-inflating bag &amp; mask, oxygen source, laryngoscope, endotracheal tubes in varying sizes, stylet</li><li>• Ensure reliable IV access</li><li>• Assistant present</li></ul> | <b>Induction:</b> <ul style="list-style-type: none"><li>• ketamine 1.5 mg/kg IV (give as a bolus and may be an effective bronchodilator at doses of 2 - 3 mg/kg); OR</li><li>• propofol 2.0 - 2.5 mg/kg IV (start with 1.0 mg/kg);</li><li>• with or without midazolam 0.1 - 0.3 mg/kg IV</li></ul> |
| <b>Preoxygenate:</b> <ul style="list-style-type: none"><li>• 100% oxygen and follow SpO<sub>2</sub>%</li></ul>                                                                                                                                                                                | <b>Paralysis:</b> <ul style="list-style-type: none"><li>• succinylcholine 1.5 mg/kg IV; OR</li><li>• rocuronium 1.0 mg/kg IV</li></ul>                                                                                                                                                              |
